# Supplementary material
Source: publisher figshare collection journal article supplement (https://karger.figshare.com/ndownloader/files/8956135)
Supplement: Supplementary file 1 [file 8956135]

## Erratum

---

In the article 'Natural Enamel Caries: A Comparative Histological Study on Biochemical Volumes' by Barbosa de Sousa et al. [Caries Res 2013;47:183–192], the following errors occurred:

(1) Second paragraph, right column, p. 186, it is stated that 'Approximately 3 times higher water volumes ...'. The correct statement should be 'This result means that the mean water volume in the SL of both NEC and AEC (gel induced) was less than predicted, and this deficit was 3 times higher in NEC compared to AEC.' (2) First paragraph, left column, p. 188, the correct sentence should be 'This is why the mean mineral volume in the SL is lower than in the BL (table 1)', not 'This is why ... was higher than in the BL (table 1).' (3) Second paragraph, right column, p. 190, it is stated that 'The water volume of the SL of artificial enamel caries ...'. The correct statement is: 'The water volume of the SL of artificial enamel caries (greater than in NEC, fig. 4) suggests that remineralization/infiltration, permeability, and opacity can be expected to be higher than at the SL of NEC and NE, in spite of the fact SL from NEC and AEC had similar mineral volumes ( $p > 0.05$ )'.
